# Supplementary material
Source: PubMed Central journal article supplement (PMC4150859)
Supplement: NIHMS617633-supplement-01.pdf [file NIHMS617633-supplement-01.pdf]

Type of file: figure

Label: Supplemental

Filename: Supplemental Figures.pptx

# Supplement Figure 1

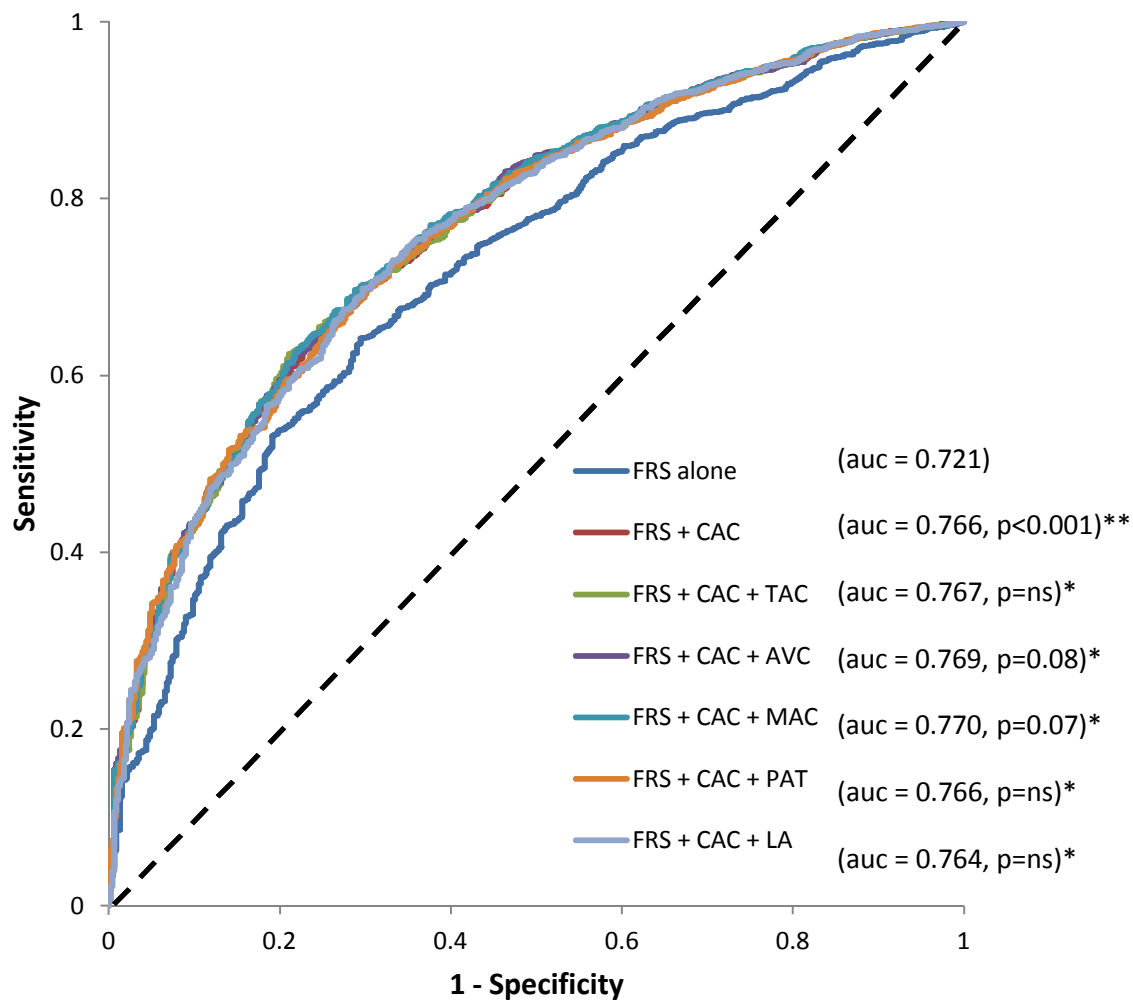

Footnote: p values compare \*\* with \*

## Supplement Figure 2

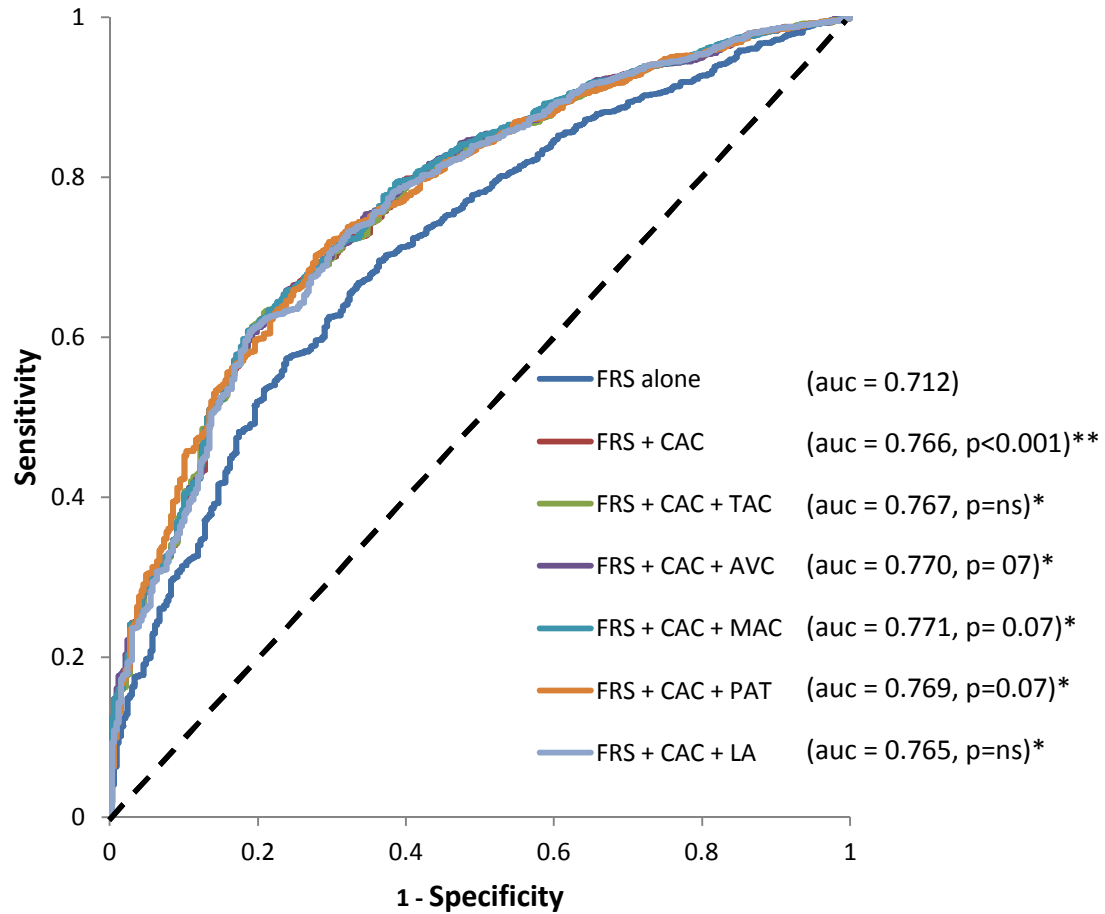

Footnote: p values compare \*\* with \*
